# Supplementary material
Source: Springer Nature journal article supplement (https://www.springermedizin.de/resource/supplementary/12968_2008_40_MOESM3_ESM.pdf/9577848)

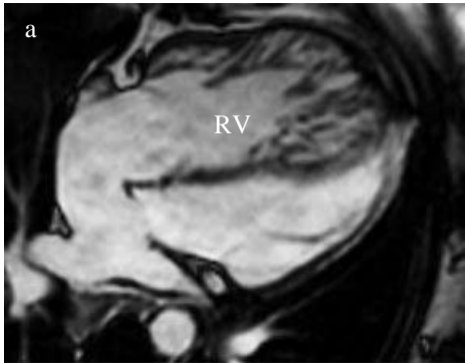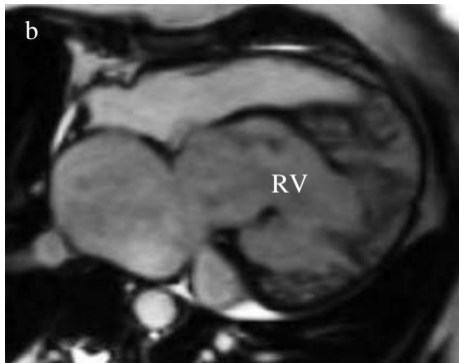

Supplement: MOESM3 [file 9577848]
